# Supplementary material for: Dietary carbohydrate intake and mortality: a prospective cohort study and meta-analysis
Source: PubMed Central journal article supplement (PMC6339822; doi:10.1016/s2468-2667(18)30135-x), 2018-08-17
Supplement: NIHMS989986-supplement-1.pdf [file NIHMS989986-supplement-1.pdf]

# THE LANCET

## Public Health

### **Supplementary appendix**

This appendix formed part of the original submission and has been peer reviewed. We post it as supplied by the authors.

Supplement to: Seidelmann SB, Claggett B, Cheng S, et al. Dietary carbohydrate intake and mortality: a prospective cohort study and meta-analysis. *Lancet Public Health* 2018; published online Aug 16. [http://dx.doi.org/10.1016/S2468-2667\(18\)30135-X](http://dx.doi.org/10.1016/S2468-2667(18)30135-X).

## **APPENDIX**

**Supplementary Figure 1. Probability of all-cause Death by Carbohydrate Intake.** Shown are age-based Kaplan–Meier curves for participants in the Atherosclerosis Risk in Communities Study by categories of total energy from carbohydrate (% carb) from the age of 50 years with respect to freedom from all-cause mortality.

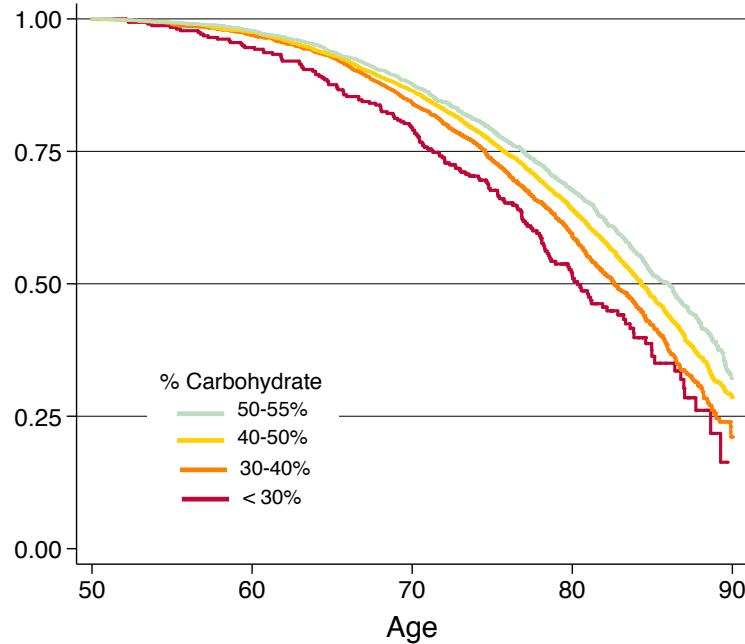

| <u>% Carb</u> | <u>Mean Survival in Years from Age 50</u> | <u>Years Difference</u> | <u>P value for difference</u> |
|---------------|-------------------------------------------|-------------------------|-------------------------------|
| >65%          |                                           | -1.1 (-0.1, -2.0) years | P=0.028                       |
| 55-65%        |                                           | 0.1 (-0.4, 0.7) years   | P=0.7                         |
| 50 to 55%     |                                           | Reference=33.1 years    | —                             |
| 40 to 50%     |                                           | -1.0 (-0.5, -1.5) years | P=1.2 x 10 <sup>-4</sup>      |
| 30 to 40%     |                                           | -2.3 (-1.7, -2.9) years | P=8.4 x 10 <sup>-13</sup>     |
| <30%          |                                           | -4.0 (-2.6, -5.3) years | P=1.1 x 10 <sup>-8</sup>      |

**Mean Residual Lifespan in Years**

**Supplementary Figure 2. Association of carbohydrate variants diets with cardiovascular (CV) and non-cardiovascular death.** a) Association between percent energy from carbohydrate and CV (red) and non-CV (blue) mortality in the ARIC cohort (N=15,428; 1903 CV and 4380 non-CV deaths). Reference level=50% energy from carbohydrate. Associations between % energy from carbohydrate substituted with Animal (b) or Plant (c) based sources of protein and fat with mortality in the ARIC cohort. Adjusted for age, gender, race, ARIC test center, total energy consumption, diabetes, cigarette smoking, physical activity, income level and education. Reference=population mean; z-scores provided. Dotted lines represent 95% confidence intervals. CV death defined from ICD-9 codes 390-459, or ICD-10 codes I00-I99.

a.

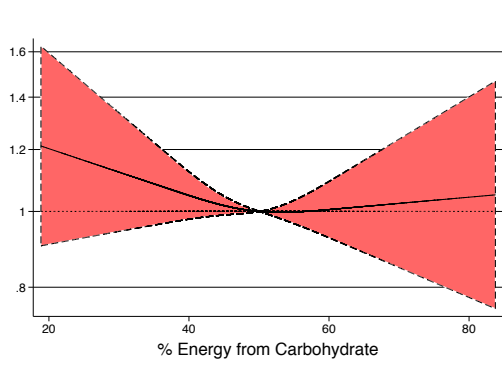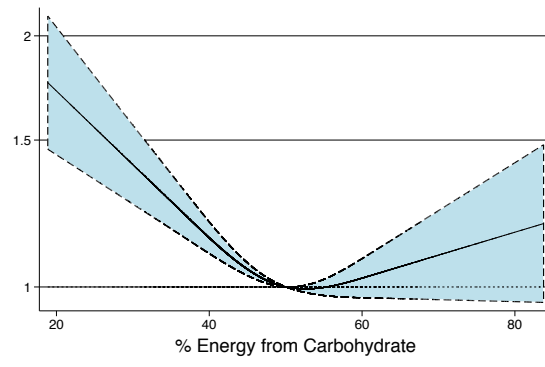

b.

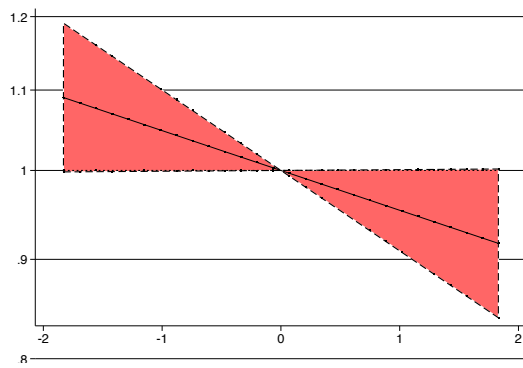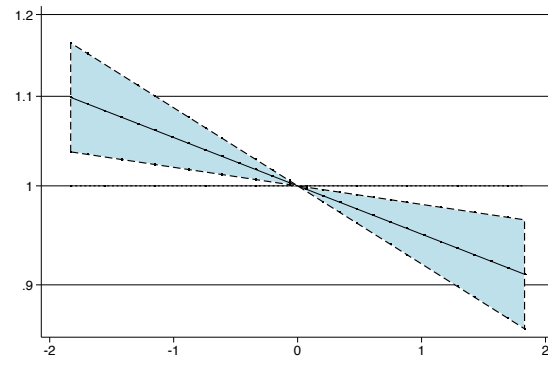

c.

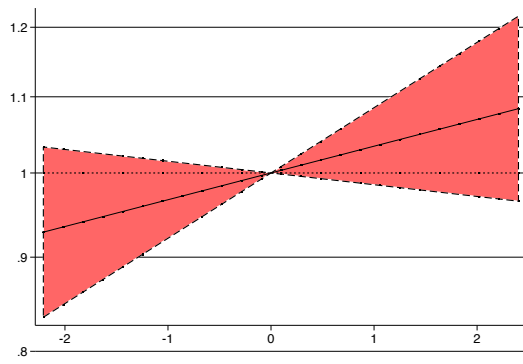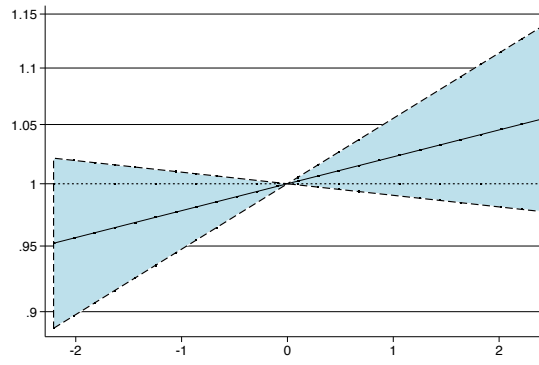

**Supplementary Figure 3. Time varying analyses incorporating ARIC visit 1 baseline and visit 3 dietary data.** a) U-shaped association between percent energy from carbohydrate and all-cause mortality in the ARIC cohort (N=15,428; 6283 deaths). Reference level=50% energy from carbohydrate. Associations between % energy from carbohydrate substituted with Animal (b) or Plant (c) based sources of protein and fat with mortality. Adjusted for age, gender, race, ARIC test center, total energy consumption, diabetes, cigarette smoking, physical activity, income level and education. Reference=population mean; z-scores provided. Dotted lines represent 95% confidence intervals.

**a.**

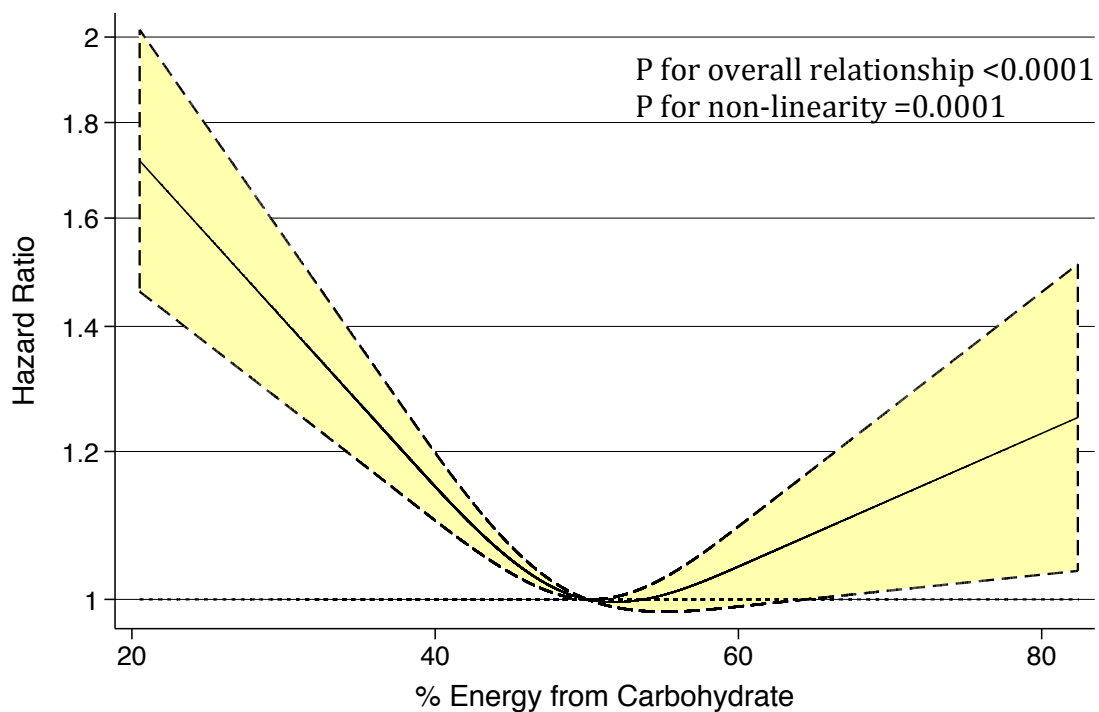

**b.**

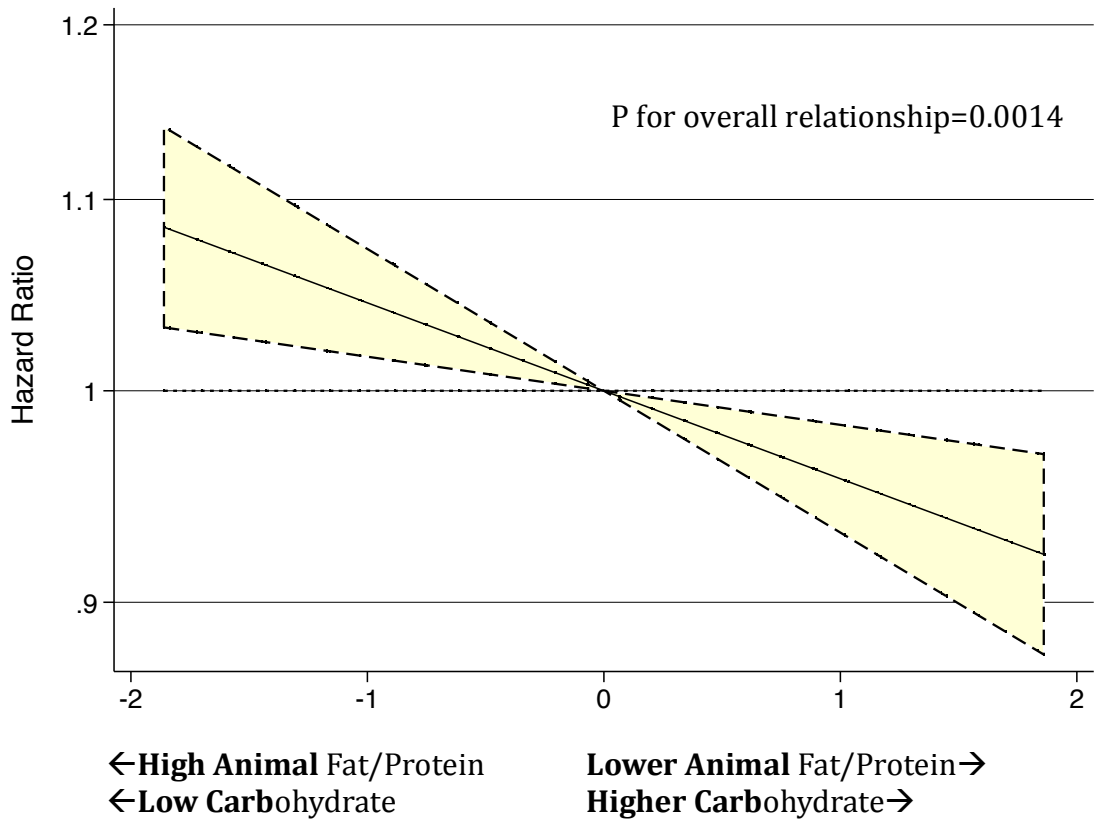

c.

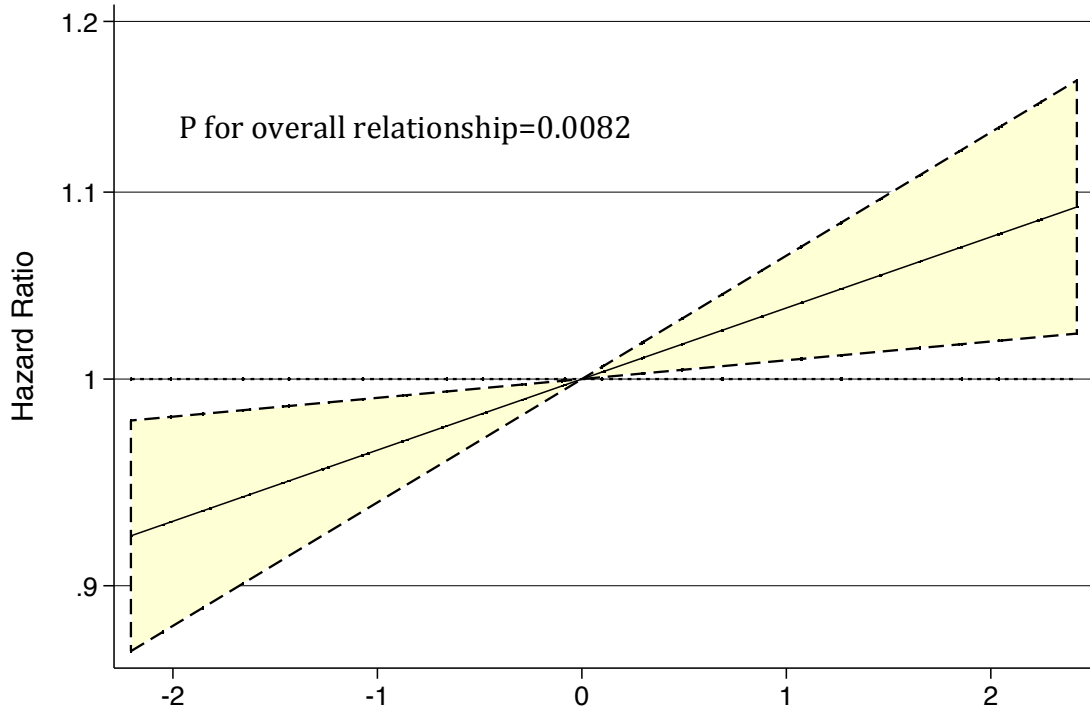

← **Higher Plant Fat/Protein**  
← **Low Carbohydrate**

**Low Plant Fat/Protein** →  
**Higher Carbohydrate** →



**Supplementary Table 1. Percent energy from carbohydrate and all-cause mortality in the ARIC cohort (N=15,428; 6283 deaths). Hazard Ratio (HR) and 95% confidence interval (CI) are reported.**

| Carbohydrate Range   | <30%             | 30-40%           | 40-50%           | 50-55%         | 55-65%           | >65%             |
|----------------------|------------------|------------------|------------------|----------------|------------------|------------------|
| N                    | 315              | 2242             | 6097             | 3026           | 3034             | 714              |
| Mean %carb, $\pm$ SD | 26.3 $\pm$ 3.7   | 36.3 $\pm$ 2.6   | 45.4 $\pm$ 2.8   | 52.3 $\pm$ 1.4 | 59.0 $\pm$ 2.7   | 70.0 $\pm$ 4.8   |
| Mortality, N(%)      | 163 (51.7%)      | 986 (44.0%)      | 2533 (41.5%)     | 1162 (38.4%)   | 1150 (37.9%)     | 289 (40.5%)      |
| Model 1, HR (95% CI) | 1.58 (1.34-1.87) | 1.32 (1.21-1.43) | 1.12 (1.05-1.21) | Reference      | 0.99 (0.91-1.07) | 1.15 (1.01-1.31) |
| Model 2, HR (95% CI) | 1.37 (1.16-1.63) | 1.21 (1.11-1.32) | 1.11 (1.03-1.19) | Reference      | 1.01 (0.93-1.10) | 1.16 (1.02-1.33) |

Model 1 adjusted for age, race and gender. Model 2 adjusted for Model 1 plus, ARIC test center, total energy consumption, diabetes, cigarette smoking, physical activity, income level and education.

**Supplementary Table 2. Sample Characteristics.** Baseline Characteristics of 15,428 women and men at baseline Visit 1 (1987-1989) in the Atherosclerosis Risk in Communities Study according to quintiles of **a) Low Carbohydrate Animal Score** or **b) Low Carbohydrate Plant Score** adjusted for age, and gender.

|                                                | ←High Animal Fat/Protein<br>←Low Carbohydrate |                   | Lower Animal Fat/Protein→<br>Higher Carbohydrate→ |                   |                   |                |
|------------------------------------------------|-----------------------------------------------|-------------------|---------------------------------------------------|-------------------|-------------------|----------------|
| <b>Animal Score Quintile</b>                   | Q1<br>n=3210                                  | Q2<br>n=3180      | Q3<br>n=3307                                      | Q4<br>n=3112      | Q5<br>n=2619      | <b>P-trend</b> |
| <b>Carbohydrate,% of energy, mean±SD</b>       | <b>38 ± 5</b>                                 | <b>45 ± 5</b>     | <b>49 ± 5</b>                                     | <b>53 ± 6</b>     | <b>61 ± 7</b>     |                |
| <b>Animal Protein (% of energy), mean±SD</b>   | <b>18.4 ± 3.6</b>                             | <b>15.1 ± 2.8</b> | <b>13.2 ± 2.7</b>                                 | <b>11.3 ± 2.4</b> | <b>8.5 ± 2.2</b>  |                |
| <b>Animal Fat (% of energy), mean±SD</b>       | <b>27.9 ± 4.4</b>                             | <b>22.5 ± 3.1</b> | <b>19.4 ± 3.0</b>                                 | <b>16.2 ± 2.9</b> | <b>12.3 ± 3.2</b> |                |
| Age, mean±SD, y                                | 53.9 ± 5.7                                    | 54.2 ± 5.8        | 54.3 ± 5.8                                        | 54.2 ± 5.8        | 54.3 ± 5.8        | 0.0126         |
| Men, N(%)                                      | 1380 (43%)                                    | 1459 (46%)        | 1548 (47%)                                        | 1416 (46%)        | 1113 (42%)        | 0.7064         |
| Black, N(%)                                    | 934 (29%)                                     | 856 (27%)         | 854 (26%)                                         | 802 (26%)         | 676 (26%)         | 0.0027         |
| BMI (kg/m <sup>2</sup> ), mean±SE              | 28.5 ± 0.1                                    | 28.1 ± 0.1        | 27.6 ± 0.1                                        | 27.2 ± 0.1        | 27.0 ± 0.1        | <0.0001        |
| Diabetes, N(%)                                 | 532 (17%)                                     | 423 (13%)         | 362 (11%)                                         | 259 (8%)          | 234 (9%)          | <0.0001        |
| Hypertension, N(%)                             | 1176 (37%)                                    | 1111 (35%)        | 1121 (34%)                                        | 1056 (34%)        | 905 (35%)         | 0.0151         |
| Smoking, current, N(%)                         | 863 (27%)                                     | 848 (27%)         | 874 (26%)                                         | 783 (25%)         | 650 (25%)         | 0.0404         |
| Exercise activity, N(%) in quintile 5          | 554 (17%)                                     | 546 (17%)         | 590 (18%)                                         | 593 (19%)         | 495 (19%)         | 0.0195         |
| College graduates, N(%)                        | 902 (28%)                                     | 848 (27%)         | 877 (27%)                                         | 760 (24%)         | 564 (22%)         | <0.0001        |
| Household income >\$50,000, N(%)               | 817 (26%)                                     | 773 (25%)         | 791 (24%)                                         | 711 (23%)         | 509 (20%)         | <0.0001        |
| Total energy intake (kcal), mean±SE            | 1546 ± 10                                     | 1621 ± 10         | 1668 ± 10                                         | 1634 ± 11         | 1662 ± 12         | <0.0001        |
| Plant Protein (% of energy), mean±SE           | 3.76 ± 0.02                                   | 4.22 ± 0.02       | 4.50 ± 0.02                                       | 4.77 ± 0.02       | 4.97 ± 0.02       | <0.0001        |
| Plant Fat (% of energy), mean±SE               | 10.8 ± 0.1                                    | 12.5 ± 0.1        | 13.2 ± 0.1                                        | 14.0 ± 0.1        | 14.1 ± 0.1        | <0.0001        |
| Saturated Fat (% of energy), mean±SE           | 14.6 ± 0.0                                    | 13.0 ± 0.0        | 11.9 ± 0.0                                        | 10.8 ± 0.0        | 9.1 ± 0.0         | <0.0001        |
| Monounsaturated Fat (% of energy), mean±SE     | 15.0 ± 0.0                                    | 13.5 ± 0.0        | 12.5 ± 0.0                                        | 11.6 ± 0.0        | 10.1 ± 0.0        | <0.0001        |
| Polyunsaturated Fat Fat (% of energy), mean±SE | 5.1 ± 0.0                                     | 5.1 ± 0.0         | 5.0 ± 0.0                                         | 5.0 ± 0.0         | 4.7 ± 0.0         | <0.0001        |
| Dietary fiber (g), mean±SE                     | 14.1 ± 0.1                                    | 16.4 ± 0.1        | 17.8 ± 0.1                                        | 18.5 ± 0.1        | 19.8 ± 0.2        | <0.0001        |
| Glycemic index                                 | 73.3 ± 0.1                                    | 74.0 ± 0.1        | 74.5 ± 0.1                                        | 75.0 ± 0.1        | 77.0 ± 0.1        | <0.0001        |
| Glycemic load                                  | 108.3 ± 1.1                                   | 133.9 ± 1.1       | 152.1 ± 1.0                                       | 163.0 ± 1.1       | 196.4 ± 1.2       | <0.0001        |

|                                           |             |             |             |             |             |         |
|-------------------------------------------|-------------|-------------|-------------|-------------|-------------|---------|
| Fruits, servings/d                        | 1.52 ± 0.02 | 1.85 ± 0.02 | 2.01 ± 0.02 | 2.07 ± 0.02 | 2.35 ± 0.03 | <0.0001 |
| Vegetables, servings/d                    | 2.90 ± 0.03 | 3.11 ± 0.03 | 3.17 ± 0.03 | 3.13 ± 0.03 | 3.17 ± 0.03 | <0.0001 |
| beef, pork, lamb as main dish, servings/d | 0.44 ± 0.00 | 0.32 ± 0.00 | 0.26 ± 0.00 | 0.19 ± 0.00 | 0.12 ± 0.00 | <0.0001 |
| beef, pork, lamb as side dish, servings/d | 0.34 ± 0.00 | 0.27 ± 0.00 | 0.23 ± 0.00 | 0.17 ± 0.00 | 0.12 ± 0.00 | <0.0001 |
| chicken with the skin, servings/d         | 0.19 ± 0.00 | 0.16 ± 0.00 | 0.14 ± 0.00 | 0.11 ± 0.00 | 0.09 ± 0.00 | <0.0001 |
| cheese, servings/d                        | 0.48 ± 0.01 | 0.42 ± 0.01 | 0.39 ± 0.01 | 0.33 ± 0.01 | 0.26 ± 0.01 | <0.0001 |
| chicken without the skin, servings/d      | 0.56 ± 0.01 | 0.54 ± 0.01 | 0.50 ± 0.01 | 0.47 ± 0.01 | 0.40 ± 0.01 | <0.0001 |
| regular soft drinks, servings/d           | 0.17 ± 0.01 | 0.26 ± 0.01 | 0.36 ± 0.01 | 0.46 ± 0.01 | 0.82 ± 0.01 | <0.0001 |

←Higher Plant Fat/Protein  
←Low Carbohydrate

Low Plant Fat/Protein→  
Higher Carbohydrate→

| Plant-Score Quintile                           | Q1<br>n=3555      | Q2<br>n=3197      | Q3<br>n=3254      | Q4<br>n=2798     | Q5<br>n=2624     | P-trend |
|------------------------------------------------|-------------------|-------------------|-------------------|------------------|------------------|---------|
| <b>Carbohydrate,% of energy, mean±SD</b>       | <b>44 ± 7</b>     | <b>47 ± 8</b>     | <b>48 ± 9</b>     | <b>49 ± 10</b>   | <b>57 ± 9</b>    |         |
| <b>Plant Protein (% of energy), mean±SD</b>    | <b>5.3 ± 1.1</b>  | <b>4.7 ± 1.1</b>  | <b>4.4 ± 1.1</b>  | <b>3.9 ± 1.1</b> | <b>3.4 ± 0.8</b> |         |
| <b>Plant Fat (% of energy), mean±SD</b>        | <b>18.3 ± 4.4</b> | <b>14.5 ± 3.4</b> | <b>12.1 ± 3.3</b> | <b>9.7 ± 3.2</b> | <b>8.1 ± 2.7</b> |         |
| Age, mean±SD, y                                | 54.4 ± 5.7        | 54.1 ± 5.7        | 54.3 ± 5.8        | 54.2 ± 5.8       | 53.7 ± 5.8       | <0.0001 |
| Men, N(%)                                      | 1681 (47%)        | 1475 (46%)        | 1461 (45%)        | 1277 (46%)       | 1022 (39%)       | <0.0001 |
| Black, N(%)                                    | 600 (17%)         | 723 (23%)         | 861 (26%)         | 898 (32%)        | 1040 (40%)       | <0.0001 |
| BMI (kg/m <sup>2</sup> ), mean±SE              | 27.5 ± 0.1        | 27.5 ± 0.1        | 27.8 ± 0.1        | 27.7 ± 0.1       | 28.2 ± 0.1       | <0.0001 |
| Diabetes, N(%)                                 | 424 (12%)         | 350 (11%)         | 386 (12%)         | 332 (12%)        | 318 (12%)        | 0.2911  |
| Hypertension, N(%)                             | 1076 (30%)        | 1050 (33%)        | 1158 (36%)        | 1047 (38%)       | 1038 (40%)       | <0.0001 |
| Smoking, current, N(%)                         | 944 (27%)         | 785 (25%)         | 837 (26%)         | 722 (26%)        | 730 (28%)        | 0.1966  |
| Exercise activity, N(%) in quintile 5          | 610 (17%)         | 625 (20%)         | 599 (18%)         | 494 (18%)        | 450 (17%)        | 0.3663  |
| College graduates, N(%)                        | 986 (28%)         | 828 (26%)         | 833 (26%)         | 739 (26%)        | 565 (22%)        | <0.0001 |
| Household income >\$50,000, N(%)               | 961 (28%)         | 825 (26%)         | 776 (24%)         | 604 (22%)        | 435 (17%)        | <0.0001 |
| Total energy intake (kcal), mean±SE            | 1612 ± 10         | 1638 ± 10         | 1622 ± 10         | 1582 ± 11        | 1677 ± 12        | 0.0486  |
| Animal Protein (% of energy), mean±SE          | 12.8 ± 0.1        | 13.3 ± 0.1        | 14.0 ± 0.1        | 14.6 ± 0.1       | 13.0 ± 0.1       | <0.0001 |
| Animal Fat (% of energy), mean±SE              | 19.4 ± 0.1        | 19.8 ± 0.1        | 20.5 ± 0.1        | 21.3 ± 0.1       | 18.9 ± 0.1       | <0.0001 |
| Saturated Fat (% of energy), mean±SE           | 12.9 ± 0.0        | 12.3 ± 0.1        | 12.0 ± 0.1        | 11.8 ± 0.1       | 10.5 ± 0.1       | <0.0001 |
| Monounsaturated Fat (% of energy), mean±SE     | 14.7 ± 0.0        | 13.3 ± 0.0        | 12.5 ± 0.0        | 11.8 ± 0.0       | 10.1 ± 0.0       | <0.0001 |
| Polyunsaturated Fat Fat (% of energy), mean±SE | 6.5 ± 0.0         | 5.4 ± 0.0         | 4.8 ± 0.0         | 4.3 ± 0.0        | 3.6 ± 0.0        | <0.0001 |
| Dietary fiber (g), mean±SE                     | 18.3 ± 0.1        | 18.0 ± 0.1        | 17.2 ± 0.1        | 16.2 ± 0.2       | 16.0 ± 0.2       | <0.0001 |
| Glycemic index                                 | 75.1 ± 0.1        | 75.2 ± 0.1        | 74.6 ± 0.1        | 73.7 ± 0.1       | 74.7 ± 0.1       | <0.0001 |
| Glycemic load                                  | 134.6 ± 1.1       | 146.0 ± 1.1       | 146.7 ± 1.1       | 144.3 ± 1.2      | 179.7 ± 1.3      | <0.0001 |
| Fruits, servings/d                             | 1.62 ± 0.02       | 1.84 ± 0.02       | 1.98 ± 0.02       | 2.10 ± 0.02      | 2.31 ± 0.03      | <0.0001 |
| Vegetables, servings/d                         | 3.21 ± 0.03       | 3.28 ± 0.03       | 3.13 ± 0.03       | 2.99 ± 0.03      | 2.77 ± 0.03      | <0.0001 |
| nuts, servings/d                               | 0.28 ± 0.00       | 0.14 ± 0.00       | 0.10 ± 0.00       | 0.07 ± 0.00      | 0.05 ± 0.01      | <0.0001 |
| peanut butter, servings/d                      | 0.52 ± 0.01       | 0.27 ± 0.01       | 0.19 ± 0.01       | 0.13 ± 0.01      | 0.10 ± 0.01      | <0.0001 |
| dark or grain breads, servings/d               | 1.05 ± 0.02       | 0.89 ± 0.02       | 0.74 ± 0.02       | 0.64 ± 0.02      | 0.49 ± 0.02      | <0.0001 |
| chocolate, servings/d                          | 0.34 ± 0.01       | 0.27 ± 0.01       | 0.22 ± 0.01       | 0.16 ± 0.01      | 0.13 ± 0.01      | <0.0001 |
| white breads, servings/d                       | 0.85 ± 0.02       | 0.84 ± 0.02       | 0.79 ± 0.02       | 0.65 ± 0.02      | 0.63 ± 0.02      | <0.0001 |
| regular soft drinks, servings/d                | 0.15 ± 0.01       | 0.26 ± 0.01       | 0.33 ± 0.01       | 0.41 ± 0.01      | 0.98 ± 0.01      | <0.0001 |
